# Supplementary material for: How Denmark, England, Estonia, France, Germany, and the USA Pay for Variable, Specialized and Low Volume Care: A Cross-country Comparison of In-patient Payment Systems
Source: PubMed Central journal article supplement (PMC10105175; doi:10.34172/ijhpm.2022.6536), 2022-05-07
Supplement: ijhpm-11-2940-s001.pdf [file ijhpm-11-2940-s001.pdf]

**Article title:** How Denmark, England, Estonia, France, Germany, and the USA Pay for Variable, Specialized and Low Volume Care: A Cross-country Comparison of In-patient Payment Systems

**Journal name:** International Journal of Health Policy and Management (IJHPM)

**Authors' information:** Wilm Quentin<sup>1,2\*</sup>, Victor Stephani<sup>3</sup>, Robert A. Berenson<sup>4</sup>, Lone Bilde<sup>5,6</sup>, Katja Grasic<sup>7</sup>, Riina Sikkut<sup>8</sup>, Mariama Touré<sup>9</sup>, Alexander Geissler<sup>10</sup>

<sup>1</sup>Department of Health Care Management, Technische Universität Berlin, Berlin, Germany.

<sup>2</sup>European Observatory on Health Systems and Policies, Brussels, Belgium.

<sup>3</sup>HelloBetter, Berlin, Germany.

<sup>4</sup>The Urban Institute, Health Policy Center, Washington, DC, USA.

<sup>5</sup>Danish Institute for Applied Social Sciences Research, Copenhagen, Denmark.

<sup>6</sup>Danish Cancer Society Research Centre, Copenhagen, Denmark.

<sup>7</sup>Centre for Health Economics, University of York, York, UK.

<sup>8</sup>The Estonian Parliament, Tallinn, Estonia.

<sup>9</sup>Poverty, Health and Nutrition Division (PHND), International Food Policy Research Institute (IFPRI), Washington, DC, USA.

<sup>10</sup>School of Medicine, University of St. Gallen, St. Gallen, Switzerland.

(Corresponding author: [wilm.quentin@tu-berlin.de](mailto:wilm.quentin@tu-berlin.de))

**Supplementary file 1**

**Table S1. Long list of countries with reasons for inclusion/exclusion**

| Country                    | Payers (multiple/single)                                    | DRG-based payment combined with ...                                    | Reason for inclusion / exclusion                                                                 |
|----------------------------|-------------------------------------------------------------|------------------------------------------------------------------------|--------------------------------------------------------------------------------------------------|
| <b>Included</b>            |                                                             |                                                                        |                                                                                                  |
| <b>Denmark</b>             | Common payment system (with adjustments)                    | Global Budgets                                                         | Recent large-scale changes in hospital-structure, systematic pathways for stroke patients        |
| <b>England</b>             | Single payer                                                | Global budget (GB), additional payments                                | Transparent DRG system, no language barrier                                                      |
| <b>Estonia</b>             | Single payer                                                | Fee for Service (FFS) (33%), per diems (28%)                           | Combination of FFS and DRG-based payments                                                        |
| <b>France</b>              | Multiple payers, common payment system                      | GB, additional payments                                                | Similarity to Belgian system concerning private hospitals (e.g. FFS-payments for doctors)        |
| <b>Germany</b>             | Multiple payers, common payment system                      | GB, additional payments, per diems                                     | Transparent DRG system, no language barrier, datadriven exclusion of services and patient-groups |
| <b>USA-Medicare Part A</b> | Multiple payer, common payment system                       | Depends on hospital                                                    | Separate FFS payments for physicians and FFS adjustments                                         |
| <b>Excluded</b>            |                                                             |                                                                        |                                                                                                  |
| <b>Sweden</b>              | Multiple payers, multiple (regional) payment systems        | Differs by council                                                     | Exclusion list varies widely between counties.                                                   |
| <b>Switzerland</b>         | Multiple payers, common payment system, negotiated prices   | Additional payments                                                    | Non-transparent negotiations about prices                                                        |
| <b>Austria</b>             | Multiple payers, common payment system                      | Differs by state, budgets, per diems                                   | DRG-based payment differs by states                                                              |
| <b>Finland</b>             | Multiple payers, multiple payment systems                   | Differs by district                                                    | DRG-based payment differs by hospital districts                                                  |
| <b>Israel</b>              | Multiple payers, common payment (possibly with adjustments) | DRGs, per diems and FFS                                                | Payment system varies by insurer                                                                 |
| <b>Italy</b>               | Single payer, common payment (with regional tariffs)        | Per diems (for long stay outliers), global budget, additional payments | Very fragmented system with great variation between regions                                      |
| <b>The Netherlands</b>     | Multiple payers, common payment system, negotiated prices   | Global budget, additional payments                                     | DRG-like payment system is too different from other DRG-based payment systems                    |
